# Supplementary material
Source: PubMed Central journal article supplement (PMC2862695)

## SUPPORTING INFORMATION

### Multi-Gram Scale Synthesis of FR180204

Samarjit Patnaik,<sup>\*a</sup> Hal Dietz,<sup>b</sup> Wei Zheng,<sup>a</sup> Christopher Austin<sup>a</sup> and Juan J. Marugan<sup>\*a</sup>

| Table of contents                               | Page |
|-------------------------------------------------|------|
| <sup>1</sup> H NMR of ketone <b>3</b> .....     | 2    |
| <sup>13</sup> C NMR of ketone <b>3</b> .....    | 3    |
| <sup>1</sup> H NMR of hydrazide <b>9</b> .....  | 4    |
| <sup>13</sup> C NMR of hydrazide <b>9</b> ..... | 5    |
| <sup>1</sup> H NMR of acid <b>10</b> .....      | 6    |
| <sup>13</sup> C NMR of acid <b>10</b> .....     | 7    |
| <sup>1</sup> H NMR of amide <b>11</b> .....     | 8    |
| <sup>13</sup> C NMR of amide <b>11</b> .....    | 9    |
| <sup>1</sup> H NMR of nitrile <b>12</b> .....   | 10   |
| <sup>13</sup> C NMR of nitrile <b>12</b> .....  | 11   |
| <sup>1</sup> H NMR of FR108204 <b>1</b> .....   | 12   |
| <sup>13</sup> C NMR of FR180204 <b>1</b> .....  | 13   |

|                        |              |                  |             |                         |                |
|------------------------|--------------|------------------|-------------|-------------------------|----------------|
| Acquisition Time (sec) | 2.0486       | Date             | Apr 15 2009 | Date Stamp              | Apr 15 2009    |
| File Name              | E:\SP01-39-1 | Points Count     | 16384       | Nucleus                 | <sup>1</sup> H |
| Original Points Count  | 13132        | Points Count     | 16384       | Receiver Gain           | 44.00          |
| Spectrum Offset (Hz)   | 2403.7971    | Frequency (MHz)  | 399.95      | Temperature (degrees C) | 25.000         |
|                        |              | Pulse Sequence   | s2pul       | Solvent                 | CHLOROFORM-d   |
|                        |              | Sweep Width (Hz) | 6410.26     |                         |                |

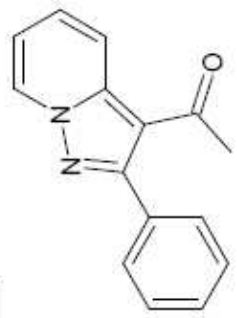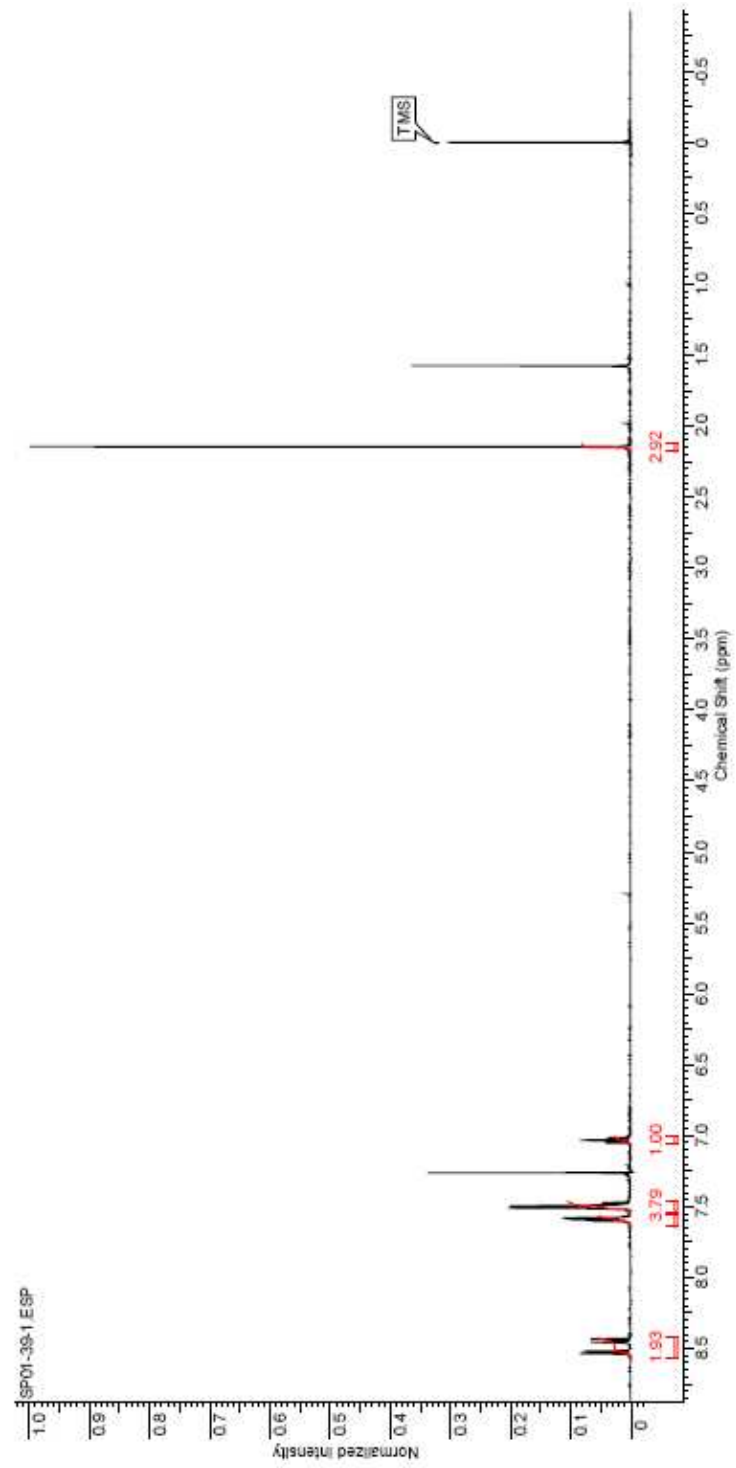

|                        |            |                  |            |                        |            |                       |                                      |
|------------------------|------------|------------------|------------|------------------------|------------|-----------------------|--------------------------------------|
| Acquisition Time (sec) | 1.3005     | Date             | Aug 1 2008 | Date Stamp             | Aug 1 2008 | File Name             | E:\FR108204_13C\SP01-1000-ketone_13C |
| Frequency (MHz)        | 100.58     | Nucleus          | 13C        | Number of Transients   | 1280       | Original Points Count | 31875                                |
| Points Count           | 32768      | Pulse Sequence   | sQul       | Receiver Gain          | 30.00      | Solvent               | CHLOROFORM-d                         |
| Spectrum Offset (Hz)   | 10555.5010 | Sweep Width (Hz) | 24509.80   | Temperature (degree C) | 25.000     |                       |                                      |

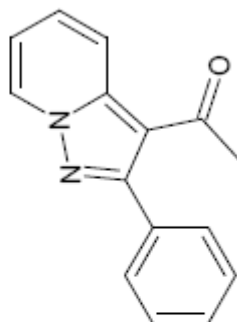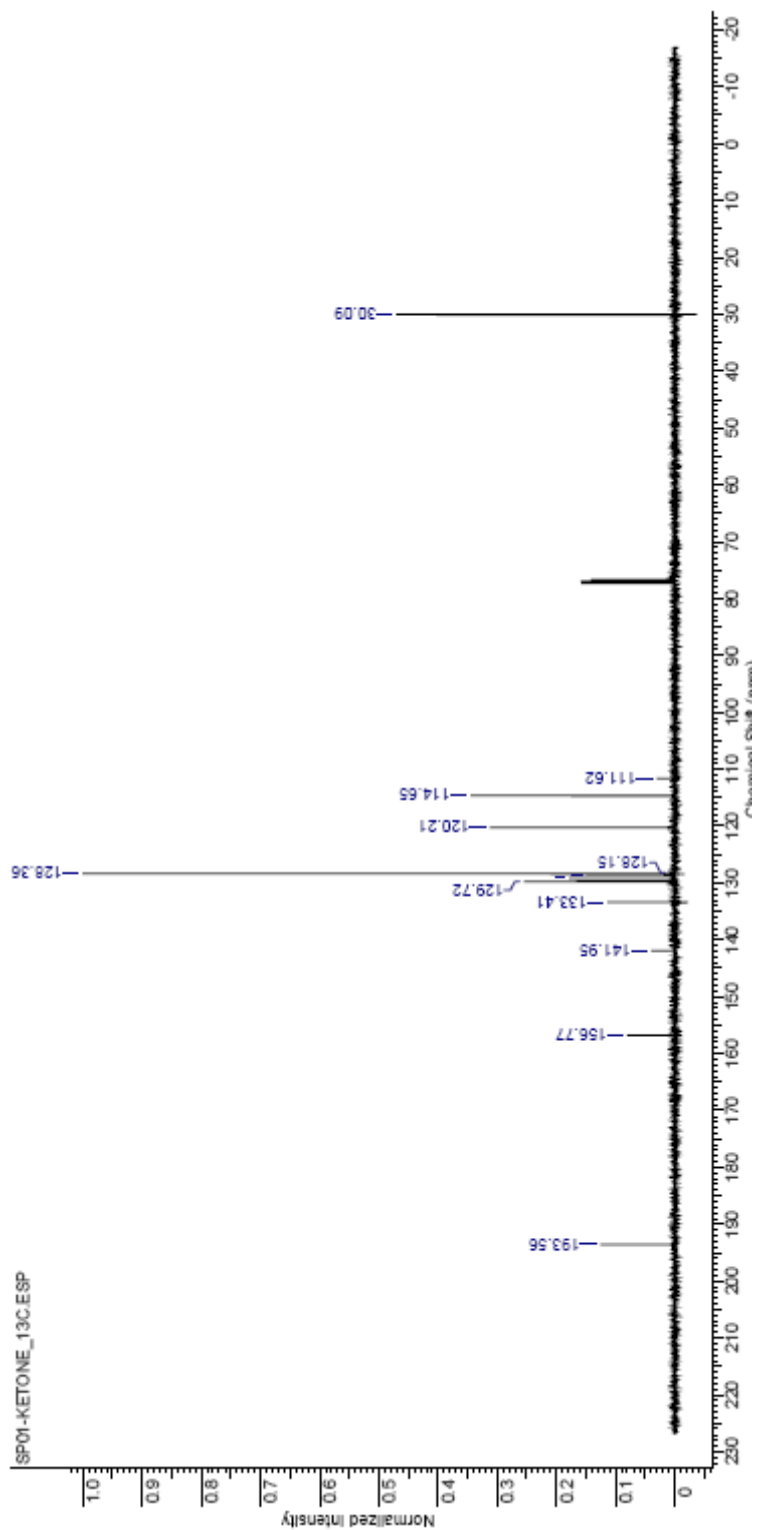

|                        |                      |                  |            |                        |                |
|------------------------|----------------------|------------------|------------|------------------------|----------------|
| Acquisition Time (sec) | 4.0000               | Date             | Aug 1 2009 | Date Stamp             | Aug 1 2009     |
| File Name              | E:\SP01-FR-hydiazide | Frequency (MHz)  | 399.82     | Nucleus                | <sup>1</sup> H |
| Original Points Count  | 25641                | Pulse Sequence   | s2ul       | Receiver Gain          | 36.00          |
| Spectrum Offset (Hz)   | 2410.5342            | Points Count     | 32768      | Temperature (degree C) | 25.000         |
|                        |                      | Sweep Width (Hz) | 6410.26    | Solvent                | DMSO-d6        |

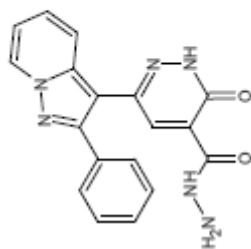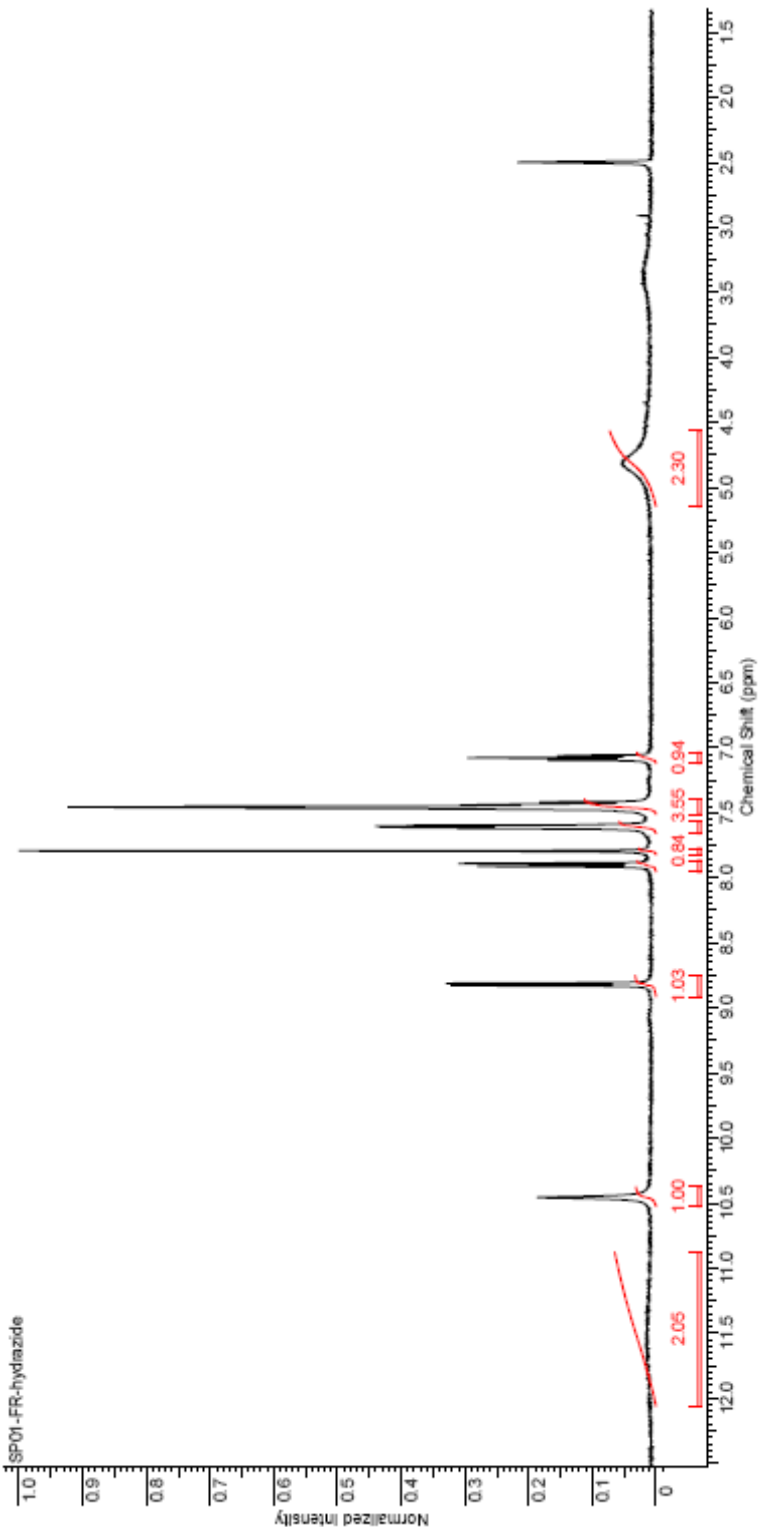

|                        |        |                      |             |                       |                                        |
|------------------------|--------|----------------------|-------------|-----------------------|----------------------------------------|
| Acquisition Time (sec) | 1.3005 | Date                 | Aug. 1 2009 | File Name             | E:\R108204_13C\SP01-1000-hydrazide_13C |
| Frequency (MHz)        | 100.68 | Number of Transients | 2500        | Original Points Count | 31875                                  |
| Pulse Sequence         | s2pul  | Solvent              | DMISO-d6    | Spectrum Offset (Hz)  | 10515.4512                             |
| Temperature (degree C) | 25.000 | Receiver Gain        | 30.00       | Sweep Width (Hz)      | 24509.80                               |

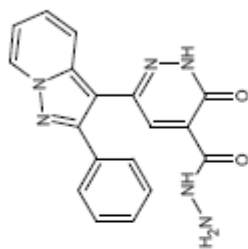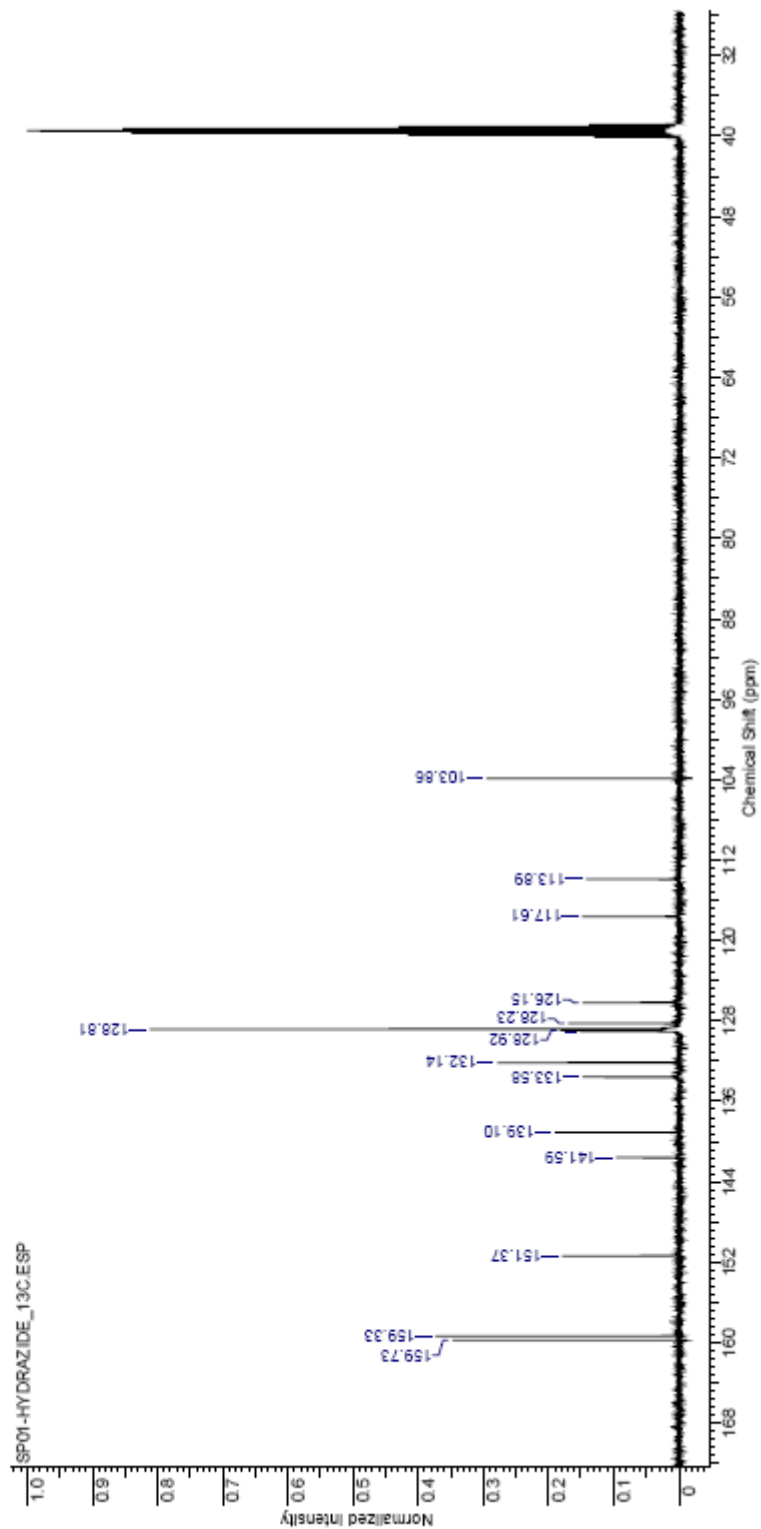

|                        |              |                  |             |                        |                |
|------------------------|--------------|------------------|-------------|------------------------|----------------|
| Acquisition Time (sec) | 2.0496       | Date             | Apr 14 2009 | Date Stamp             | Apr 14 2009    |
| File Name              | E:\SP01-53-1 | Frequency (MHz)  | 399.95      | Nucleus                | <sup>1</sup> H |
| Original Points Count  | 13132        | Pulse Sequence   | s2pul       | Receiver Gain          | 48.00          |
| Spectrum Offset (Hz)   | 2409.0459    | Points Count     | 16384       | Solvent                | DMSO-d6        |
|                        |              | Sweep Width (Hz) | 6410.26     | Temperature (degree C) | 25.000         |

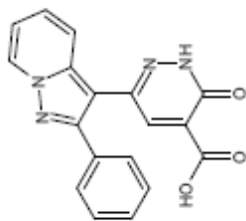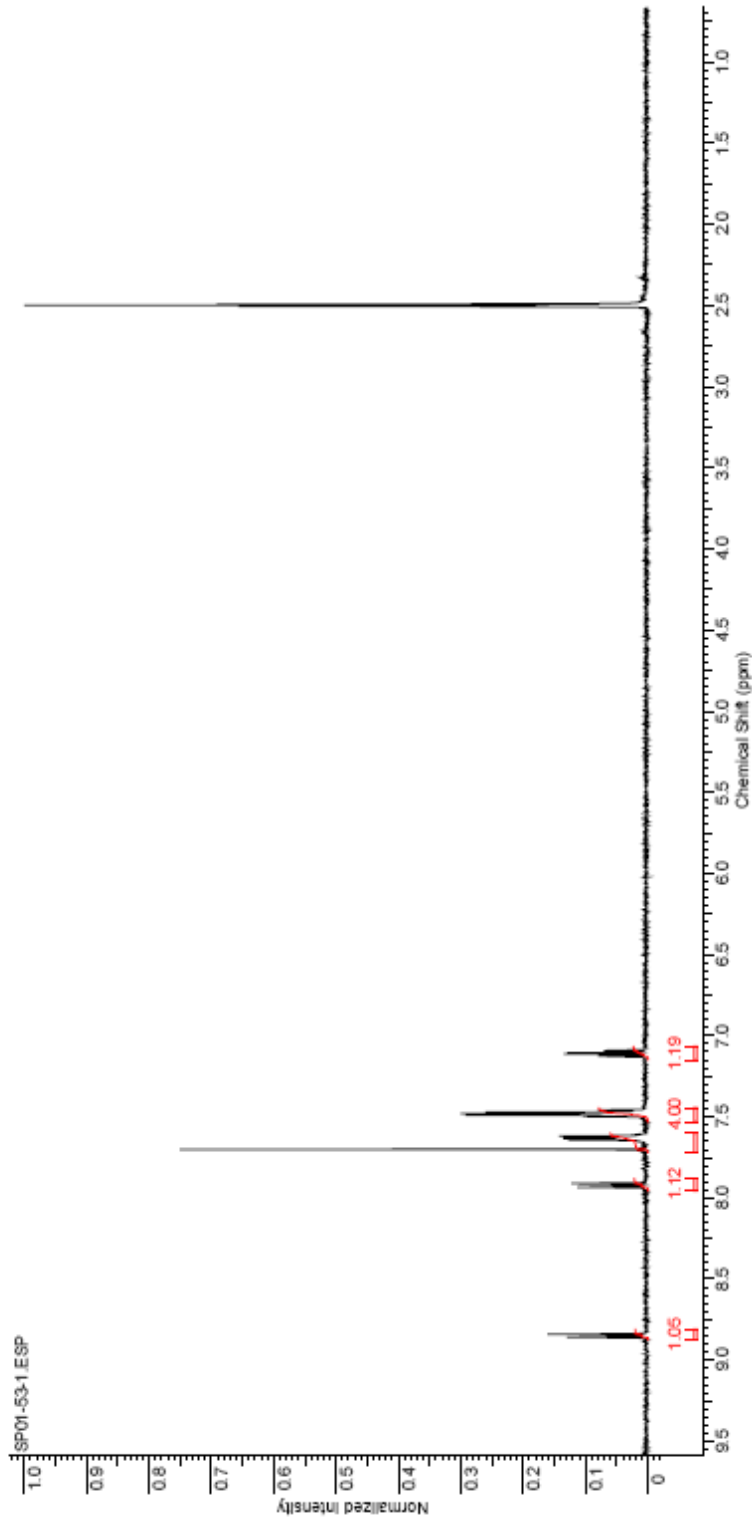

|                        |                                    |                        |            |                      |            |
|------------------------|------------------------------------|------------------------|------------|----------------------|------------|
| Acquisition Time (sec) | 1.3005                             | Date                   | Aug 1 2009 | Date Stamp           | Aug 1 2009 |
| File Name              | E:\FR106204_13C\SP01-1000-acid_13C | Points Count           | 32768      | Nucleus              | 13C        |
| Original Points Count  | 31875                              | Sweep Width (Hz)       | 24509.80   | Receiver Gain        | 30.00      |
| Spectrum Offset (Hz)   | 10520.6865                         | Frequency (MHz)        | 100.56     | Number of Transients | 1280       |
|                        |                                    | Pulse Sequence         | s2pul      | Solvent              | DMSO-d6    |
|                        |                                    | Temperature (degree C) | 25.000     |                      |            |

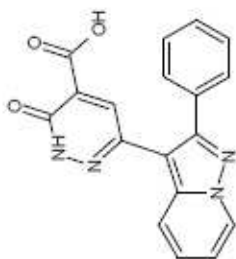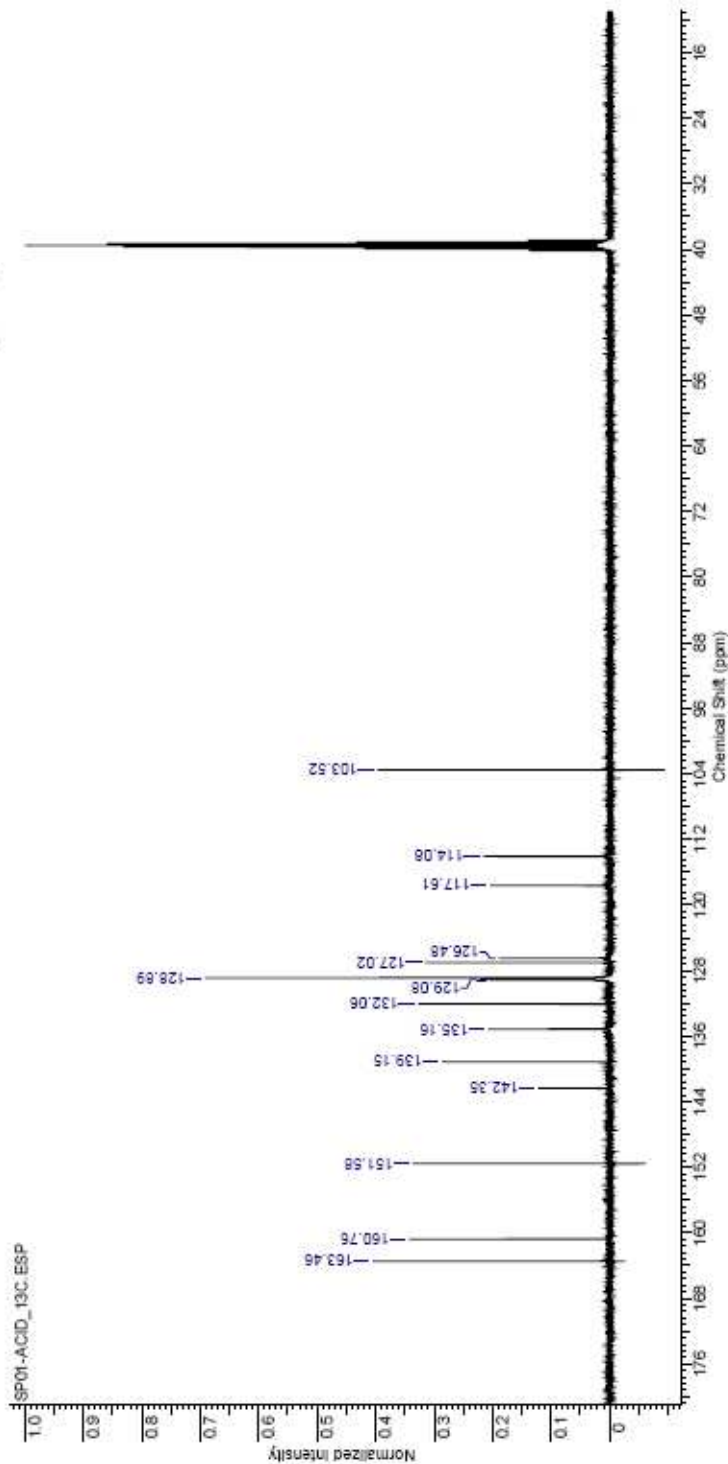

|                        |               |                  |            |                        |                |
|------------------------|---------------|------------------|------------|------------------------|----------------|
| Acquisition Time (sec) | 4.0000        | Date             | May 5 2009 | Date Stamp             | May 5 2009     |
| File Name              | E:\SPA01-80-1 | Points Count     | 32768      | Nucleus                | <sup>1</sup> H |
| Original Points Count  | 25641         | Sweep Width (Hz) | 6410.26    | Receiver Gain          | 44.00          |
| Spectrum Offset (Hz)   | 2412.8176     | Frequency (MHz)  | 399.95     | Temperature (degree C) | 25.000         |
|                        |               | Pulse Sequence   | zgpg30     | Solvent                | DMSO-d6        |
|                        |               |                  |            |                        |                |

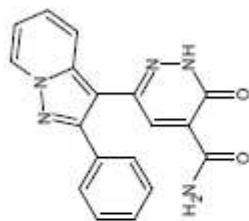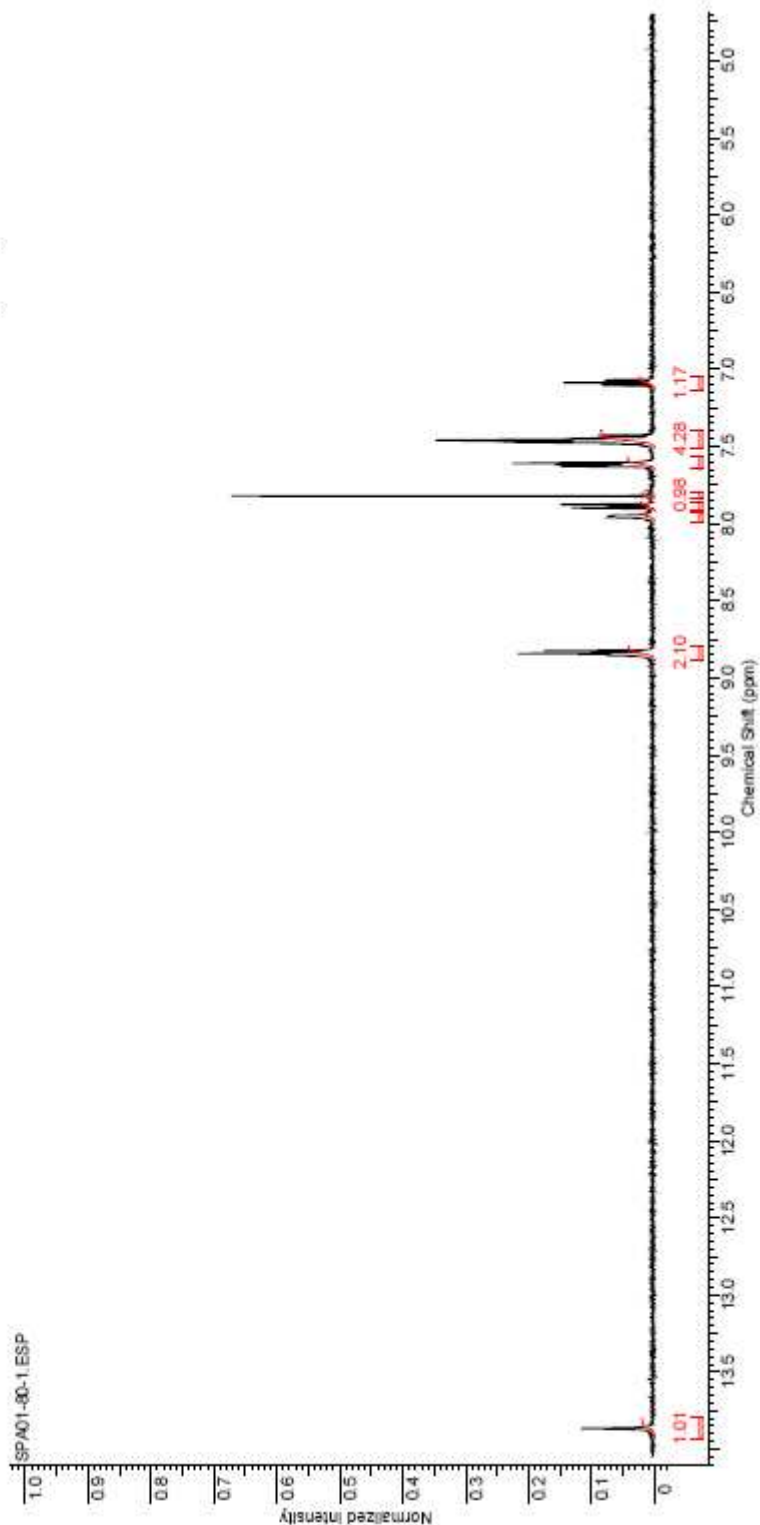



|                        |                                        |                        |            |                      |                 |
|------------------------|----------------------------------------|------------------------|------------|----------------------|-----------------|
| Acquisition Time (sec) | 1.3005                                 | Date                   | Aug 1 2009 | Date Stamp           | Aug 1 2009      |
| File Name              | E:\FR108204_13C\al-SP01-1000-amide_13C | Points Count           | 32768      | Nucleus              | <sup>13</sup> C |
| Original Points Count  | 31875                                  | Sweep Width (Hz)       | 24509.80   | Receiver Gain        | 30.00           |
| Spectrum Offset (Hz)   | 10515.4512                             | Frequency (MHz)        | 100.56     | Number of Transients | 256             |
|                        |                                        | Pulse Sequence         | sgzbw      | Solvent              | DMSO-d6         |
|                        |                                        | Temperature (degree C) | 25.000     |                      |                 |

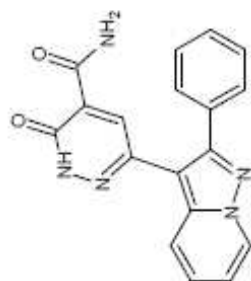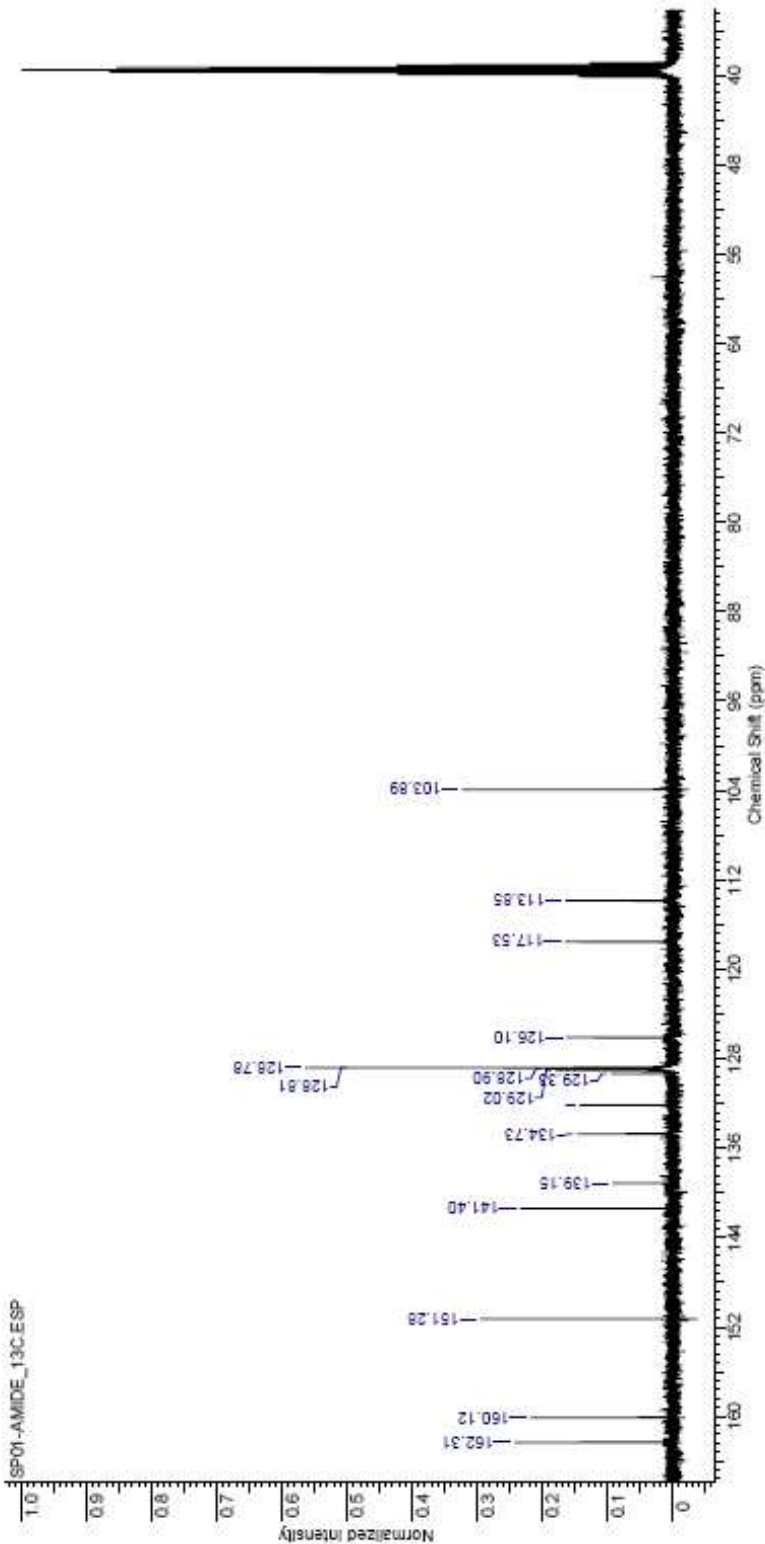

| Acquisition Time (sec) | 2.0495       | Date             | Apr 21 2009 | Date Stamp             | Apr 21 2009    |
|------------------------|--------------|------------------|-------------|------------------------|----------------|
| File Name              | E:\SP01-60-1 | Frequency (MHz)  | 399.95      | Nucleus                | <sup>1</sup> H |
| Original Points Count  | 13132        | Pulse Sequence   | s.zpul      | Receiver Gain          | 48.00          |
| Spectrum Offset (Hz)   | 2408.6545    | Sweep Width (Hz) | 6410.26     | Temperature (degree C) | 25.000         |
|                        |              |                  |             | Solvent                | DMSO-d6        |

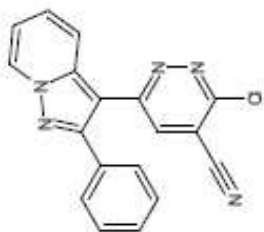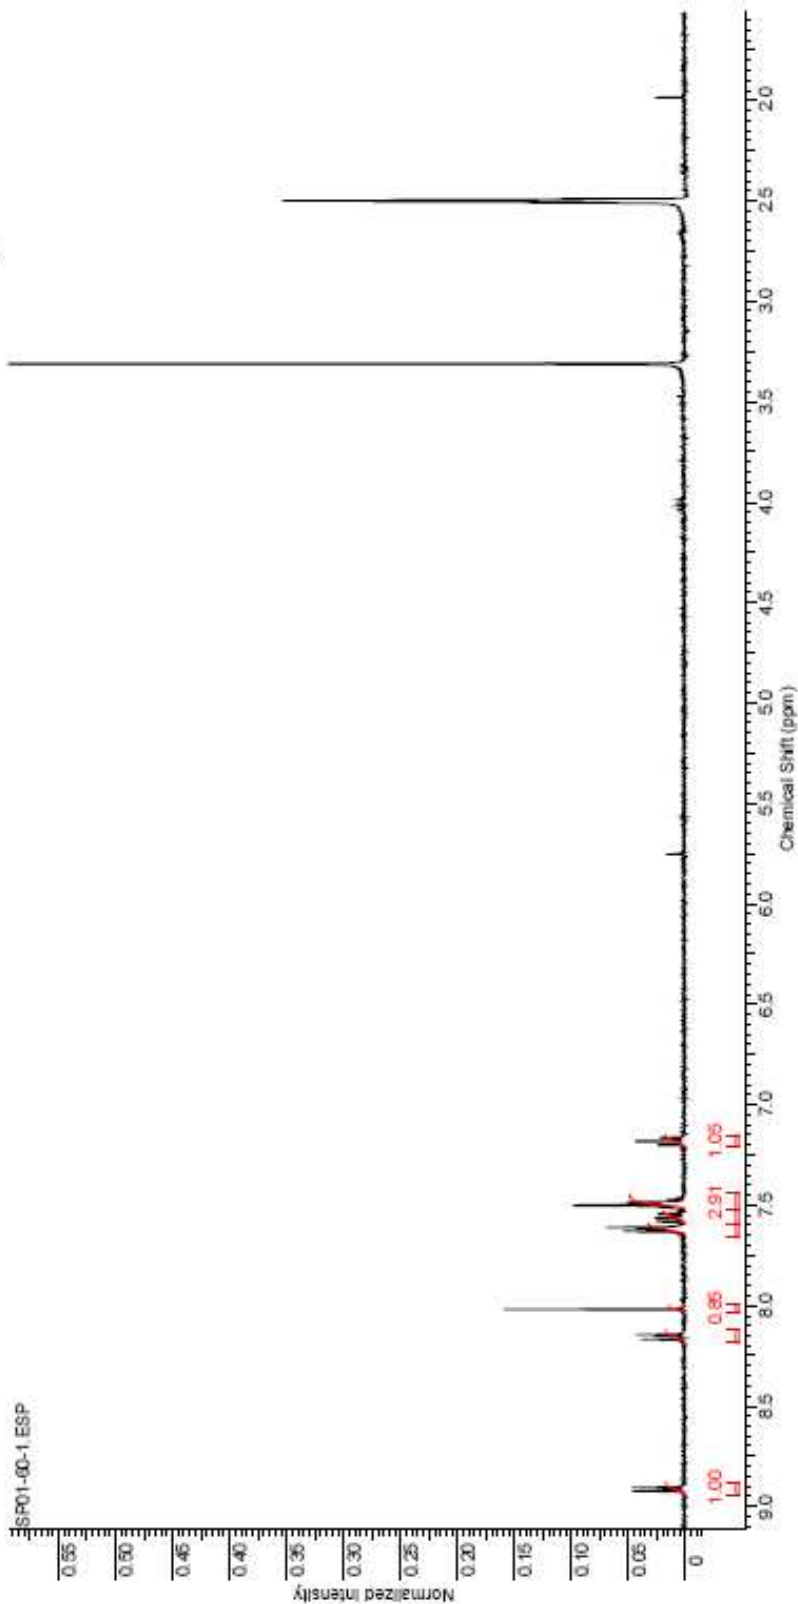

|                        |            |                  |            |                        |            |                       |                                        |
|------------------------|------------|------------------|------------|------------------------|------------|-----------------------|----------------------------------------|
| Acquisition Time (sec) | 1.3005     | Date             | Aug 1 2008 | Date Stamp             | Aug 1 2008 | File Name             | E:\FR108204_13C\SI901-1000-nitrile_13C |
| Frequency (MHz)        | 100.62     | Nucleus          | 13C        | Number of Transients   | 256        | Original Points Count | 31875                                  |
| Points Count           | 32768      | Pulse Sequence   | gcpul      | Receiver Gain          | 30.00      | Solvent               | CHLOROFORM-d                           |
| Spectrum Offset (Hz)   | 10567.9571 | Sweep Width (Hz) | 24509.80   | Temperature (degree C) | 25.000     |                       |                                        |

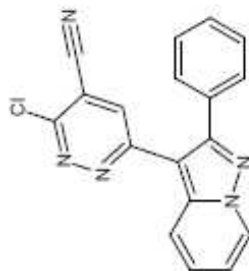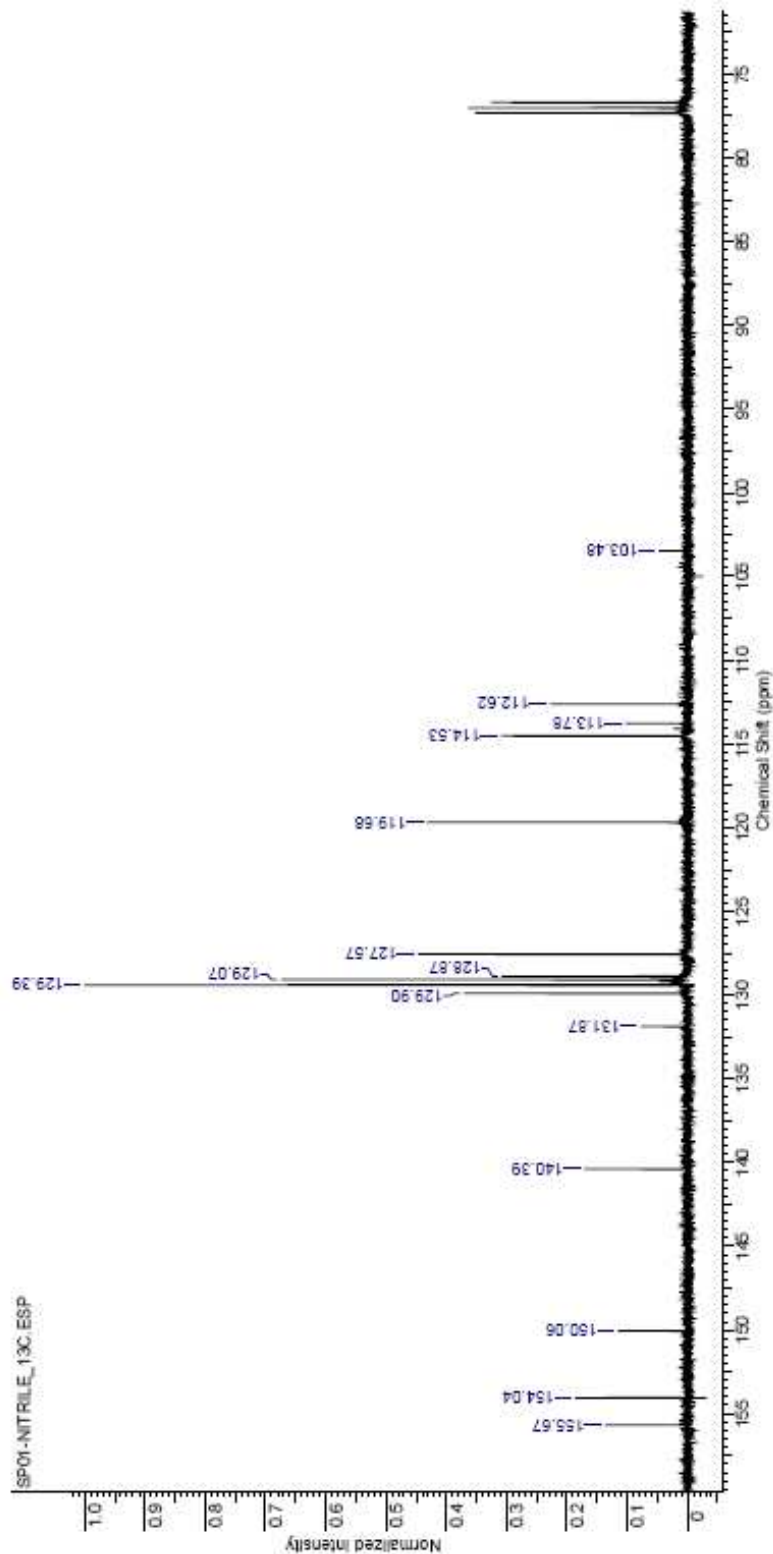



|                        |            |                  |             |                        |             |                       |                                        |
|------------------------|------------|------------------|-------------|------------------------|-------------|-----------------------|----------------------------------------|
| Acquisition Time (sec) | 1.3005     | Date             | Aug. 1 2009 | Date Stamp             | Aug. 1 2009 | File Name             | E:\FR108204_13C\SP01-1000-FR108204_13C |
| Frequency (MHz)        | 100.68     | Nucleus          | 13C         | Number of Transients   | 1280        | Original Points Count | 31875                                  |
| Points Count           | 32758      | Pulse Sequence   | zgpgc       | Receiver Gain          | 30.00       | Solvent               | DMSO-d6                                |
| Spectrum Offset (Hz)   | 10515.4512 | Sweep Width (Hz) | 24509.80    | Temperature (degree C) | 25.000      |                       |                                        |

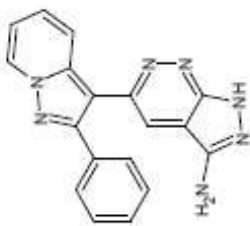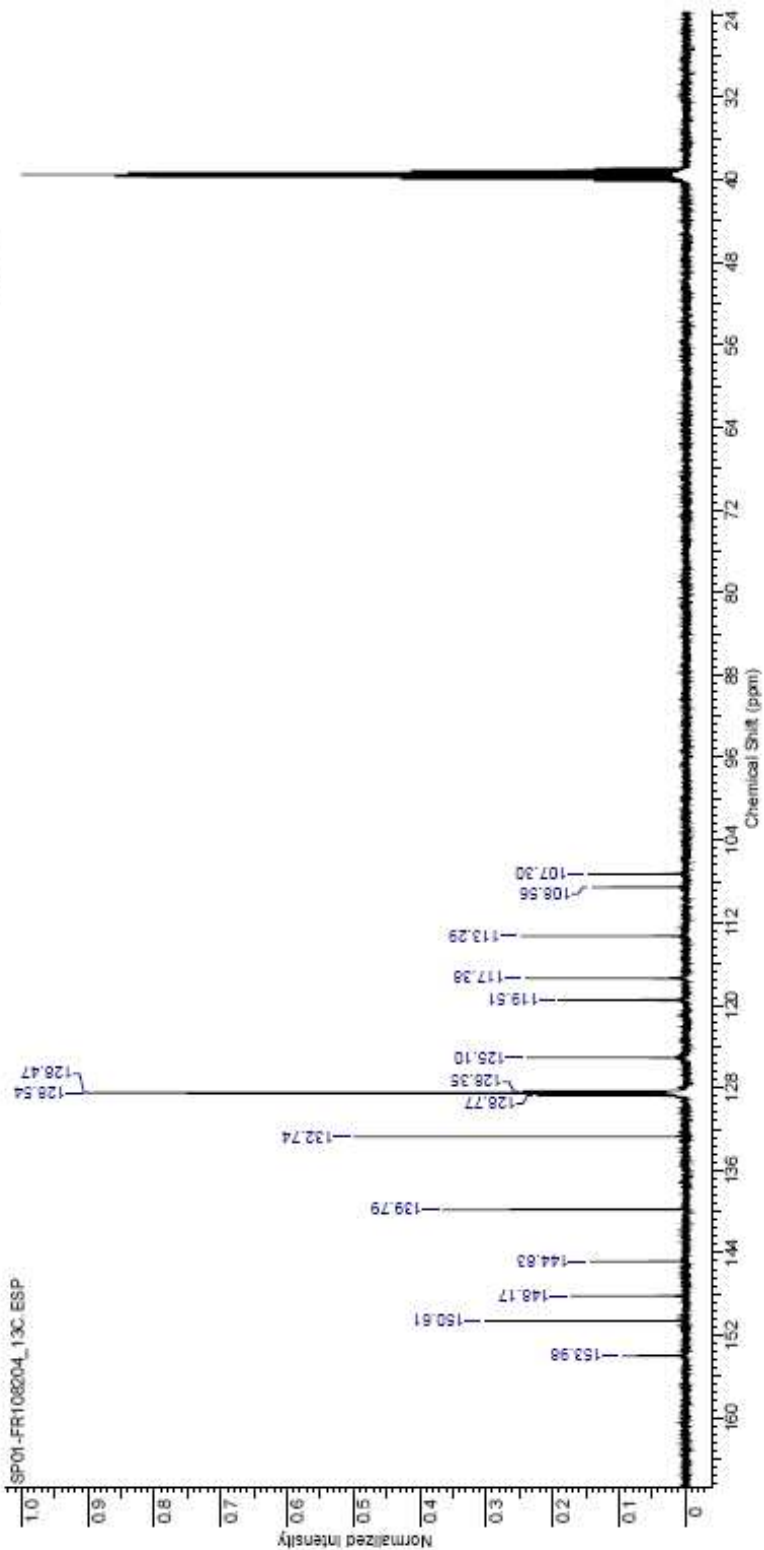

Supplement: NIHMS192150-supplement-Supporting.pdf [file NIHMS192150-supplement-Supporting.pdf]
